# Supplementary material for: Dissipative Particle Dynamics Simulation of the Sensitive Anchoring Behavior of Smectic Liquid Crystals at Aqueous Phase
Source: MDPI journal article supplement (doi:10.3390/molecules27217433), 2022-11-01
Supplement: s1 [file s1]

# Supporting Information

## Dissipative Particle Dynamics Simulation of the Sensitive Anchoring Behavior of Smectic Liquid Crystals at Aqueous Phase

Shiwei Chen, Jinliang Zhang, Huilong Liu, Tongyue Qiu, Haoxiang Tang and Zunmin Zhang \*

State Key Laboratory of Materials-Oriented Chemical Engineering, College of Chemical Engineering,  
Nanjing Tech University, Nanjing 211816, China

\* Correspondence: zunmin.zhang@njtech.edu.cn

# Contents

- S1. Bead density distributions of representative smectic anchoring configurations
- S2. Representative anchoring snapshots in an ordering process
- S3. Representative anchoring snapshots in a reorientation process

## S1. Bead density distributions of representative smectic anchoring configurations

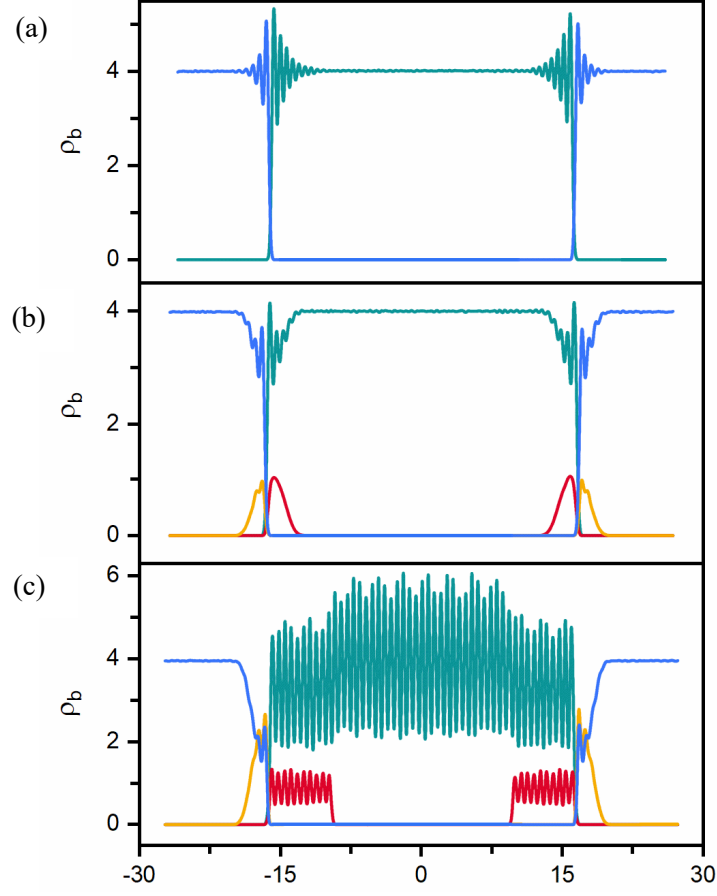

**Figure S1.** Bead density distributions of the mesogens (Cyan), amphiphile tails (Red), amphiphile heads (Orange) and water (Blue) in three representative anchoring configurations of smectic ( $T = 0.3$ ) LCs: (a) planar anchoring at  $\rho_s = 0.0$ , (b) tilted anchoring at  $\rho_s = 0.2$  and (c) homeotropic anchoring at  $\rho_s = 0.6$ .

## S2. Representative anchoring snapshots in an ordering process

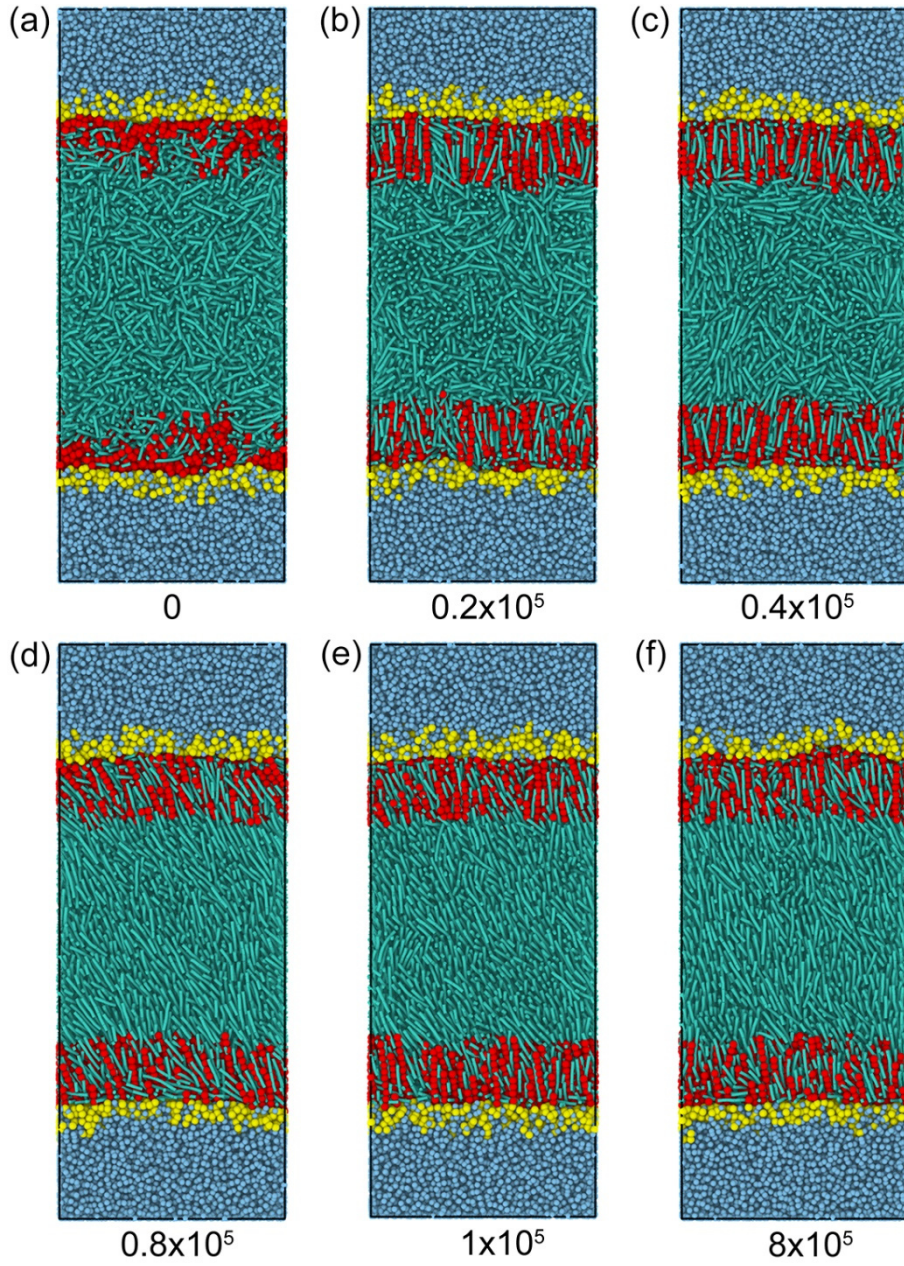

**Figure S2.** Instantaneous snapshots of six representative configurations in an ordering process by cooling a disordering configuration at  $\rho_s = 0.85$  to the homeotropic nematic anchoring at  $T = 0.6$ , when (a)  $t = 0$ , (b)  $t = 0.2 \times 10^5$  time steps, (c)  $t = 0.4 \times 10^5$  time steps, (d)  $t = 0.8 \times 10^5$  time steps, (e)  $t = 1.0 \times 10^5$  time steps and (f)  $t = 8.0 \times 10^5$  time steps.



### S3. Representative anchoring snapshots in a reorientation process

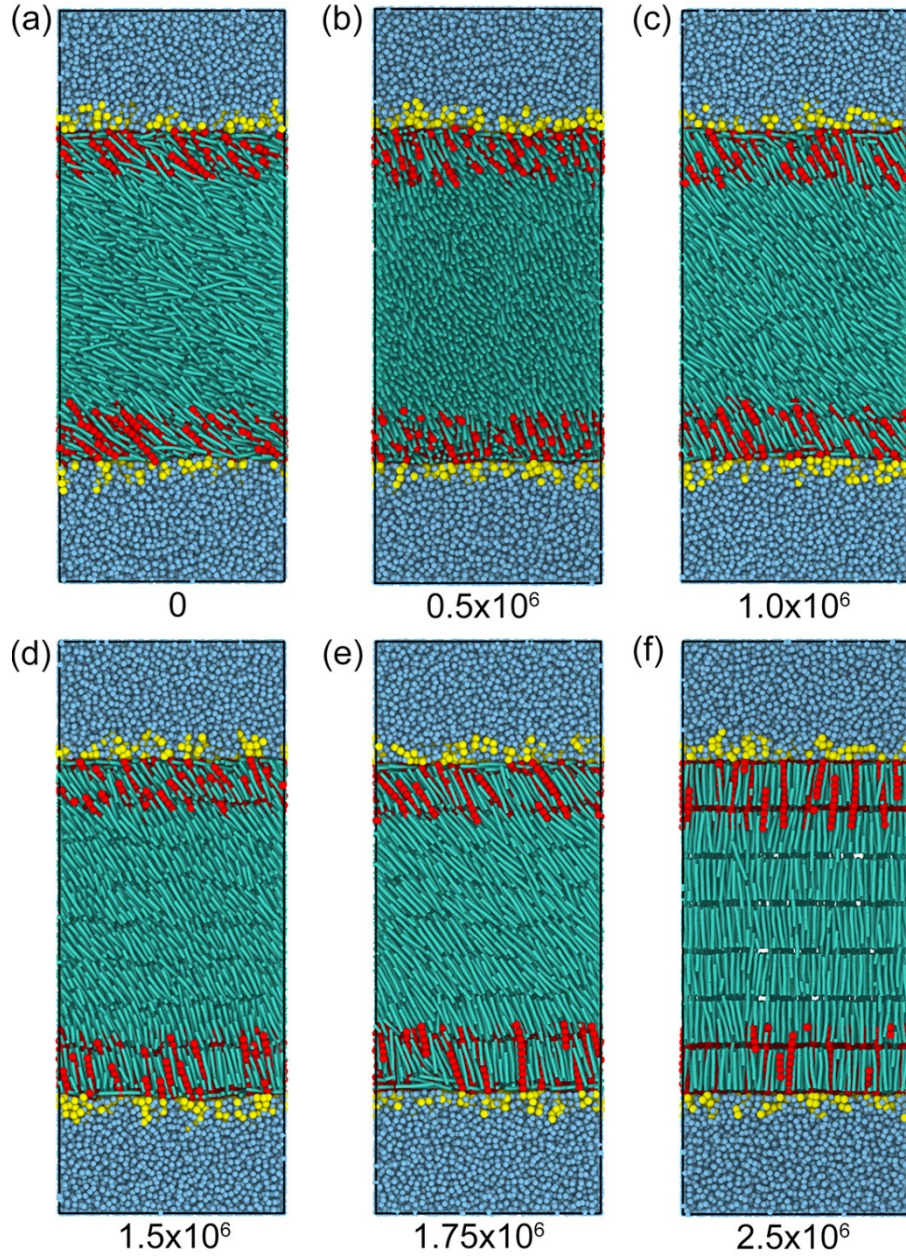

**Figure S3.** Instantaneous snapshots of six representative configurations in a reorientation process by cooling the tilted anchoring configuration at  $\rho_s = 0.4$  and  $T = 0.6$  to the homeotropic smectic anchoring at  $T = 0.3$ , when (a)  $t = 0$ , (b)  $t = 0.5 \times 10^6$  time steps, (c)  $t = 1.0 \times 10^6$  time steps, (d)  $t = 1.5 \times 10^6$  time steps, (e)  $t = 1.75 \times 10^6$  time steps, and (f)  $t = 2.5 \times 10^6$  time steps.
